# Supplementary material for: Band-structure-controlled BiO(ClBr)(1−x)/2Ix solid solutions for visible-light photocatalysis
Source: Royal Society of Chemistry journal article supplement (doi:10.1039/c4ta07128j), 2015-01-01
Supplement: c4ta07128j1.pdf [file c4ta07128j1.pdf]

## Electronic Supplementary Information

### **Band-Structure-Controlled $\text{BiO}(\text{ClBr})_{(1-x)/2}\text{I}_x$ Solid Solutions for Visible-Light Photocatalysis**

Guigao Liu<sup>a,b</sup>, Tao Wang<sup>b</sup>, Shuxin Ouyang<sup>c</sup>, Lequan Liu<sup>c</sup>, Haiying Jiang<sup>b</sup>, Qing Yu<sup>a,b</sup>, Tetsuya Kako<sup>b</sup>, and Jinhua Ye<sup>\*,a,b,c</sup>

<sup>a</sup> Graduate School of Chemical Science and Engineering, Hokkaido University, Sapporo, Japan.

<sup>b</sup> Environmental Remediation Materials Unit and International Center for Materials Nanoarchitectonics (WPI-MANA), National Institute for Materials Science (NIMS), 1-1 Namiki, Tsukuba, Ibaraki, Japan.

<sup>c</sup> TU-NIMS Joint Research Center, School of Materials Science and Engineering, Tianjin University, 92 Weijin Road, Nankai District, Tianjin, P. R. China.

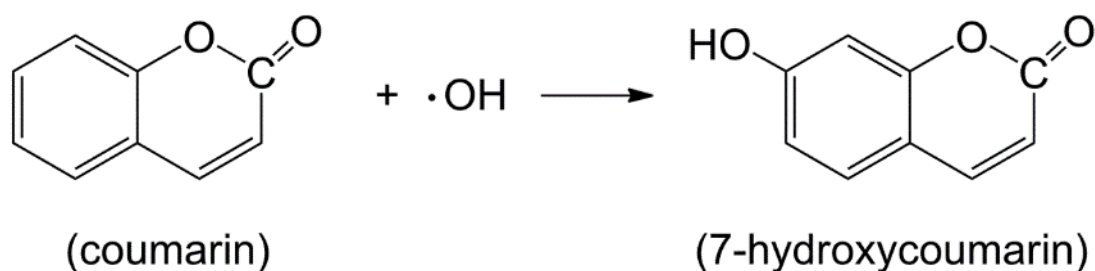

Figure S1. The reaction between  $\cdot\text{OH}$  and coumarin to form 7-hydroxycoumarin.

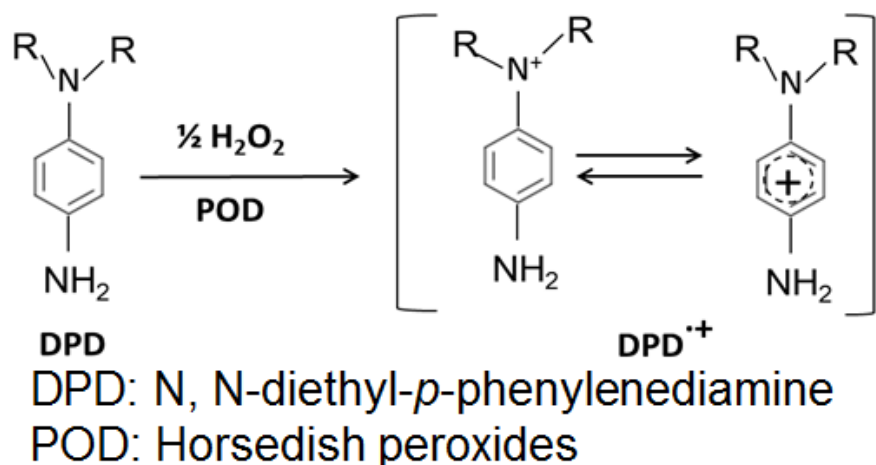

Figure S2. The reaction mechanism of detecting  $\text{H}_2\text{O}_2$ .

The measurement of  $\text{H}_2\text{O}_2$  was conducted by using the colorimetric DPD method, which is based on the horsedish peroxides (POD)-catalyzed oxidation of N, N-diethyl-*p*-phenylenediamine (DPD) by  $\text{H}_2\text{O}_2$ .<sup>1, 2</sup> Typically, two molecules of DPD could be oxidized by  $\text{H}_2\text{O}_2$  with POD as catalyst to form the radical cation,  $\text{DPD}^{\bullet+}$ . The reaction is shown in Figure S2.

Since the radical cation,  $\text{DPD}^{\bullet+}$  can exhibit a stable color with the maximum absorption at 551 nm, the concentration of  $\text{H}_2\text{O}_2$  in the measured solution can be calculated from the absorbance at 551 nm by considering the following relationship:

$$[\text{H}_2\text{O}_2]_{\text{sample}} = (I^{551} V_{\text{final}}) / e l V_{\text{sample}}$$

Where the  $I^{551}$  is the absorbance at 551 nm,  $V_{\text{final}}$  is the final volume after addition of all reagents and buffer,  $V_{\text{sample}}$  is the volume of original sample,  $e$  is the constant,  $l$  is the path length of optical cell. Since the measurements were conducted under the same conditions, the values of  $V_{\text{final}}$ ,  $V_{\text{sample}}$ ,  $e$  and  $l$  were kept constant. Thus, the concentration of  $\text{H}_2\text{O}_2$  can be monitored by the absorption of the solution at 551 nm.

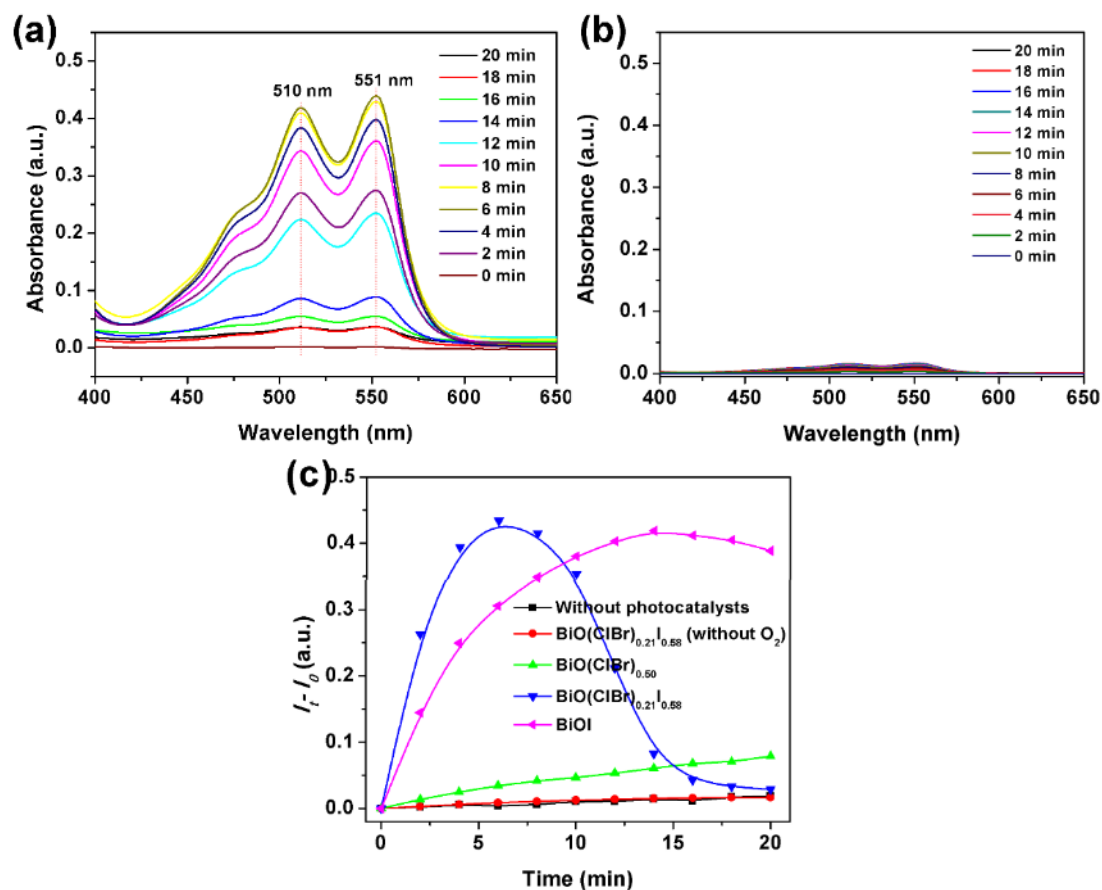

Figure S3. Time-dependent absorption spectra of the DPD/POD-BiO(ClBr)<sub>0.21</sub>I<sub>0.58</sub> solution in the presence (a) and absence (b) of O<sub>2</sub>. (c) Generation of H<sub>2</sub>O<sub>2</sub> during irradiation of different photocatalysts in the presence of methanol as an electron donor (the absorption intensity is an index of H<sub>2</sub>O<sub>2</sub> formation).

As shown in Figure S3c, it can be seen that H<sub>2</sub>O<sub>2</sub> was not formed in the absence of O<sub>2</sub> though the high active BiO(ClBr)<sub>0.21</sub>I<sub>0.58</sub> photocatalysts were added. This result indicates that H<sub>2</sub>O<sub>2</sub> was indeed generated from O<sub>2</sub> reduction by excited electrons.<sup>2, 3</sup>

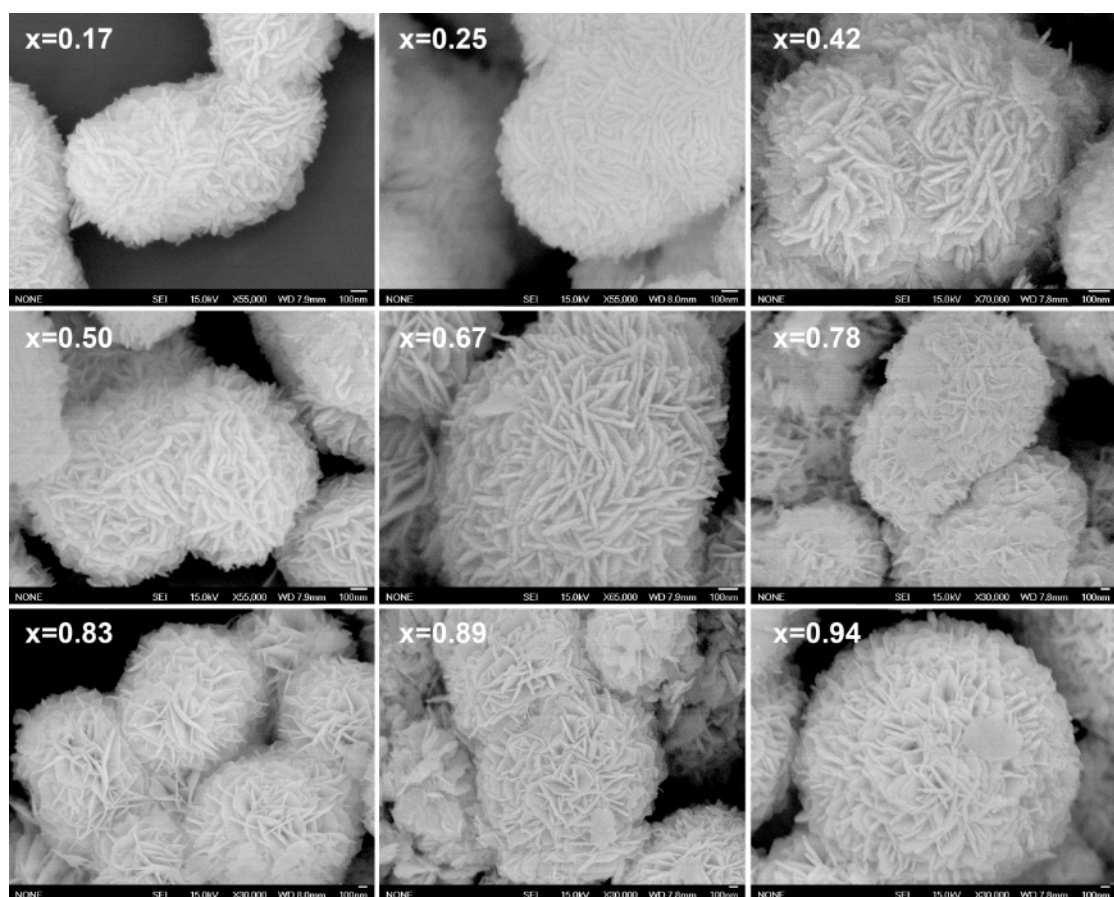

Figure S4. SEM images of  $\text{BiO}(\text{ClBr})_{(1-x)/2}\text{I}_x$  solid solutions.

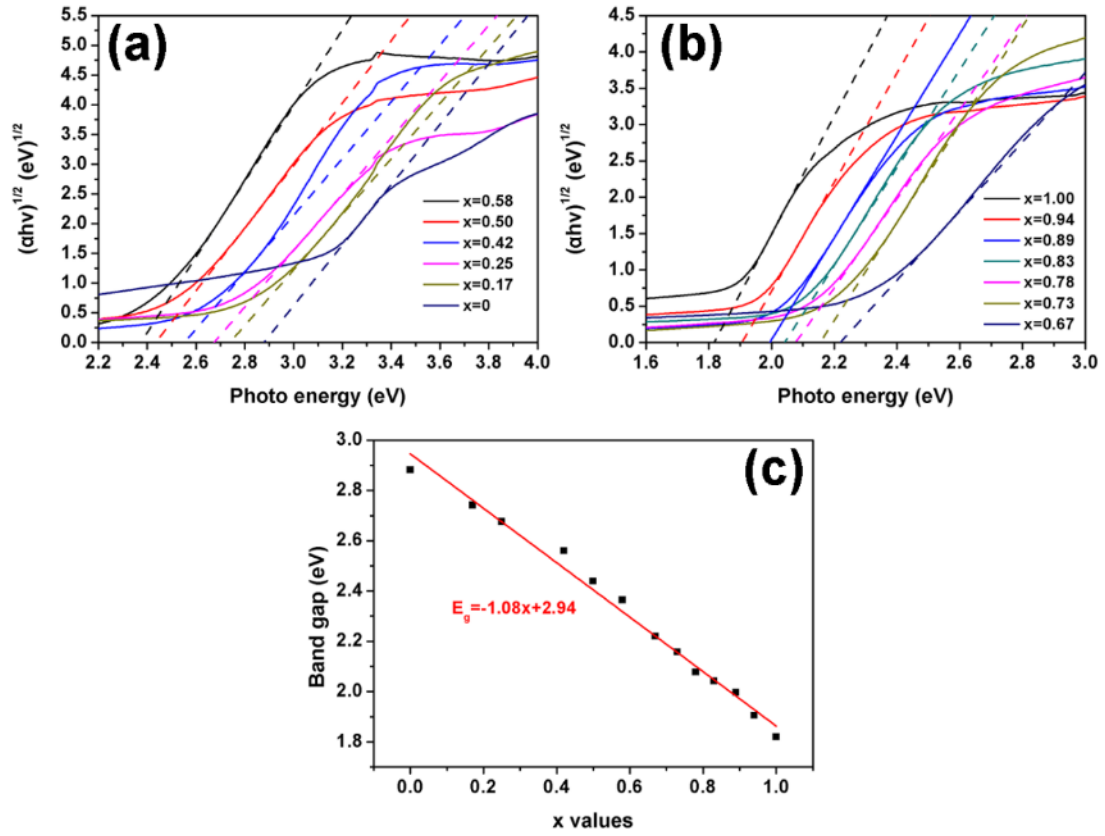

Figure S5. (a and b)  $(\alpha h\nu)^{1/2}$  versus  $h\nu$  plots of  $\text{BiO}(\text{ClBr})_{(1-x)/2}\text{I}_x$  solid solutions (c) Band gaps as a function of  $x$  in the solid solutions. The fitting line is added to guide the eye.



structure would be relative stable (close to the BiOI crystal structure) and thus the evolution of lattice parameters become slow again (Figure 4a). Additionally, the similar results were also reported by Keller *et al.*<sup>4</sup> They found that the  $\text{BiOCl}_{1-x}\text{I}_x$  solid solutions were changed from Cl-rich phase to I-rich phase with  $x$  increasing and that the lattice parameter  $c$  showed a sharp increase at the phase transition point.

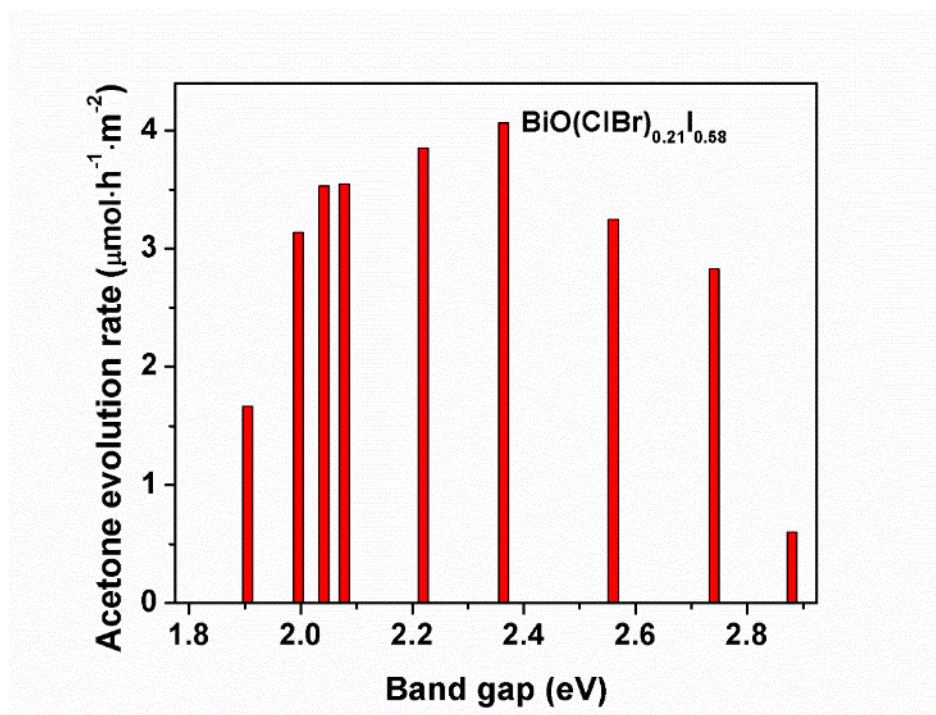

Figure S7. Comparison of surface area normalized acetone evolution rates of  $\text{BiO}(\text{ClBr})_{(1-x)/2}\text{I}_x$  solid solutions with various band gaps.

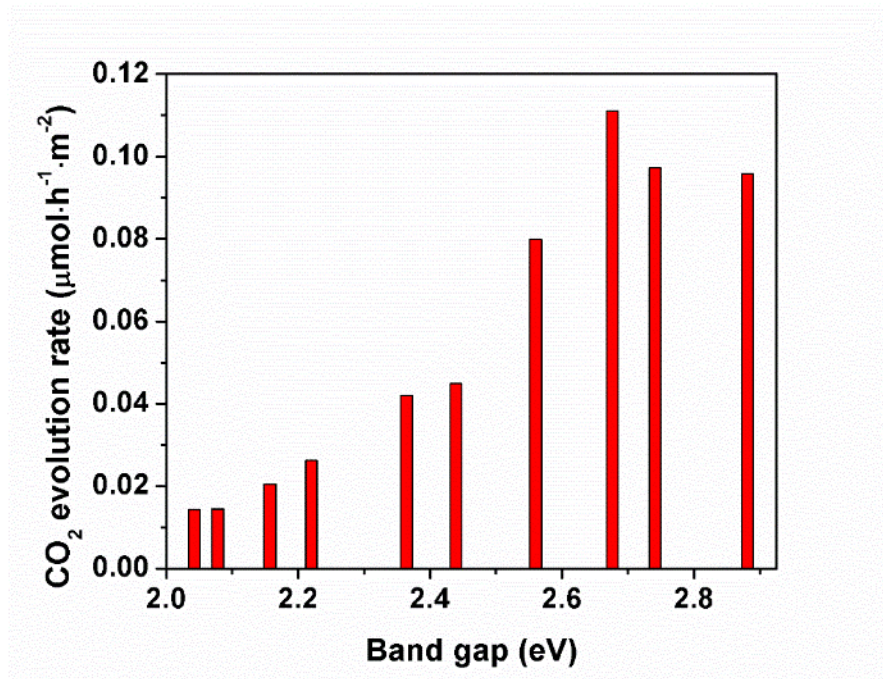

Figure S8. Comparison of surface area normalized CO<sub>2</sub> evolution rates of BiO(ClBr)<sub>(1-x)/2</sub>I<sub>x</sub> solid solutions with various band gaps.

#### Calculation of the internal quantum efficiency:

The internal quantum efficiency (IQE) was calculated according to the method reported in literature [5] and [6].

Take BiO(ClBr)<sub>0.415</sub>I<sub>0.17</sub> for example, under the visible light irradiation, the wavelength of visible light is from 400 to 800 nm, and the light intensity is 30.5 mW/cm<sup>2</sup>. The irradiating area is 8.5 cm<sup>2</sup>. Therefore, the absorption rate of incident photons ( $R_p^a$ ) was determined to be 0.05 μmol·sec<sup>-1</sup> using the following

equation:  $R_p^a = \int_{400}^{800} S \times \alpha \times I$  (S is the area of the sample,  $\alpha$  is the light absorption and I is the light intensity at each wavelength). As for acetone evolution ( $\text{CH}_3\text{CHOHCH}_3 + e^- + \text{O}_2 + \text{H}^+ \rightarrow \text{CH}_3\text{CHOCH}_3 + \bullet\text{OH} + \text{H}_2\text{O}$  or  $\text{CH}_3\text{CHOHCH}_3 + h^+ \rightarrow \text{CH}_3\text{CHOCH}_3 + e^- + 2\text{H}^+$ ), only one photon is required to produce one acetone molecule. In case of CO<sub>2</sub> generation ( $\text{CH}_3\text{CHOHCH}_3 + 5\text{H}_2\text{O} + 18h^+ \rightarrow 3\text{CO}_2 + 18\text{H}^+$ ), six photons are required to produce one CO<sub>2</sub> molecule. The acetone and CO<sub>2</sub> rates ( $R_{\text{ACE}}$  and  $R_{\text{CO}_2}$ ) were

determined to be 12.8 and 0.44  $\mu\text{mol} \cdot \text{h}^{-1}$  (Figure 6a). Thus, the IQE of

$\text{BiO}(\text{ClBr})_{0.415}\text{I}_{0.17}$  could be calculated using the following equation:

$$\text{IQE} = (\text{R}_{\text{ACE}} + 6 \times \text{R}_{\text{CO}_2}) / \text{R}_{\text{p}}^{\text{a}} \times 100\%$$

$$= ((12.8 + 6 \times 0.44) / 3600) \mu\text{mol} \cdot \text{sec}^{-1} / 0.05 \mu\text{mol} \cdot \text{sec}^{-1} \times 100\%$$

$$= 8.6\%$$

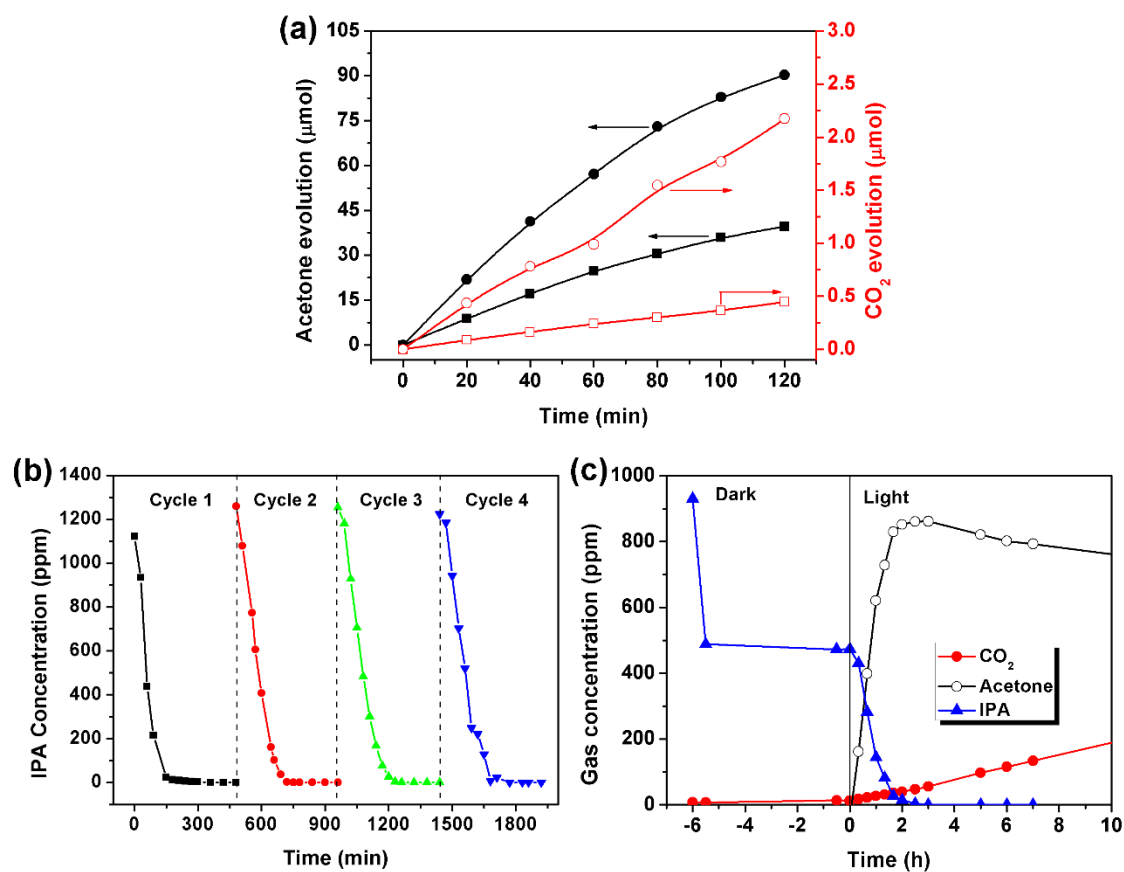

Figure S9. (a) Curves of acetone (filled symbols) and CO<sub>2</sub> evolution (open symbols) in photodegradation of IPA over BiO(ClBr)<sub>0.21</sub>I<sub>0.58</sub> (■ □) and BiO(ClBr)<sub>0.21</sub>I<sub>0.58</sub>-1.0 wt% Pt (● ○). The loading Pt was conducted by a typical photodeposition method using methanol as scavenger for holes. (b) Cycling degradation of IPA over BiO(ClBr)<sub>0.21</sub>I<sub>0.58</sub> photocatalysts. (c) The concentration evolutions of IPA, acetone and CO<sub>2</sub> during the first ten hours of long-term photodegradation experiment over BiO(ClBr)<sub>0.21</sub>I<sub>0.58</sub> photocatalysts.

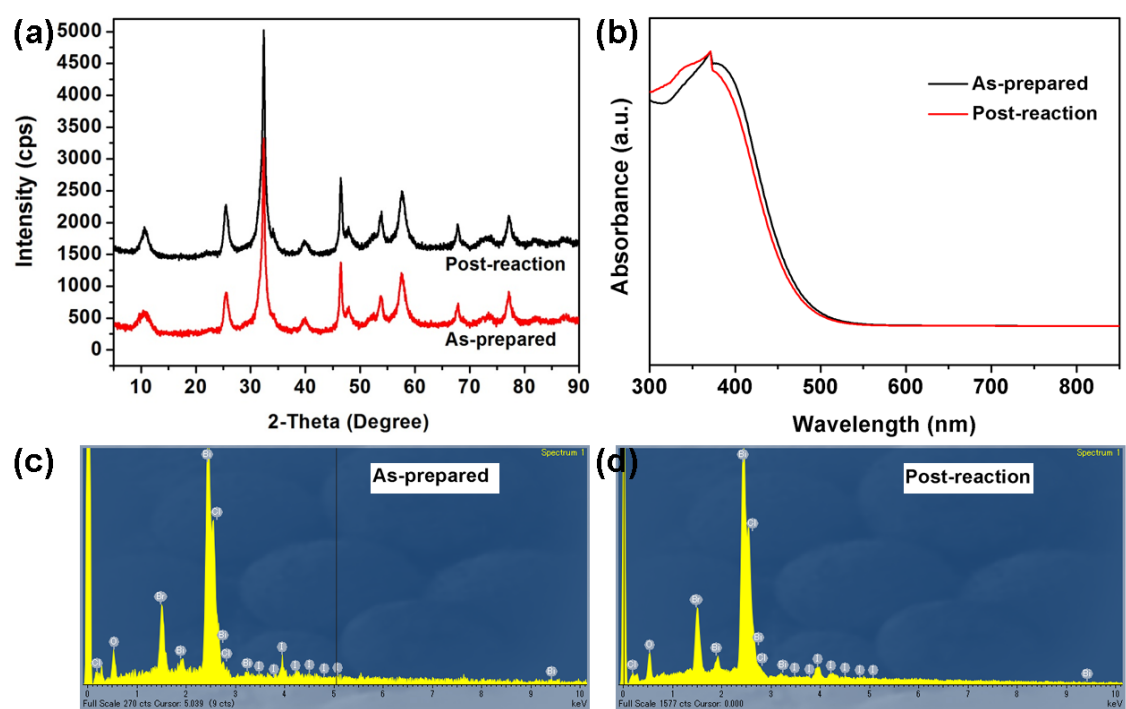

Figure S10. (a) XRD patterns, (b) UV-vis absorption spectra and (c and d) EDS spectra of as-prepared and post-reaction  $\text{BiO}(\text{ClBr})_{0.21}\text{I}_{0.58}$  photocatalysts.

Table S2. The composition ratios of halogen elements and the lattice parameters of as-prepared and post-reaction  $\text{BiO}(\text{ClBr})_{0.21}\text{I}_{0.58}$  photocatalysts.

| $\text{BiO}(\text{ClBr})_{0.21}\text{I}_{0.58}$ | Composition ratios for halogen elements (Atomic %) <sup>[1]</sup> |          |          | Lattice parameters (Å) <sup>[2]</sup> |          |
|-------------------------------------------------|-------------------------------------------------------------------|----------|----------|---------------------------------------|----------|
|                                                 | Cl                                                                | Br       | I        | a                                     | c        |
|                                                 |                                                                   |          |          |                                       |          |
| As-prepared                                     | 41.4±4.7                                                          | 38.6±2.3 | 20.0±4.3 | 3.898(5)                              | 7.969(2) |
| Post-reaction                                   | 40.8±3.8                                                          | 38.9±2.5 | 20.3±1.3 | 3.895(0)                              | 7.960(3) |

[1] The composition ratios for halogen elements were obtained from EDX analysis.

[2] The lattice parameters were calculated from XRD data.

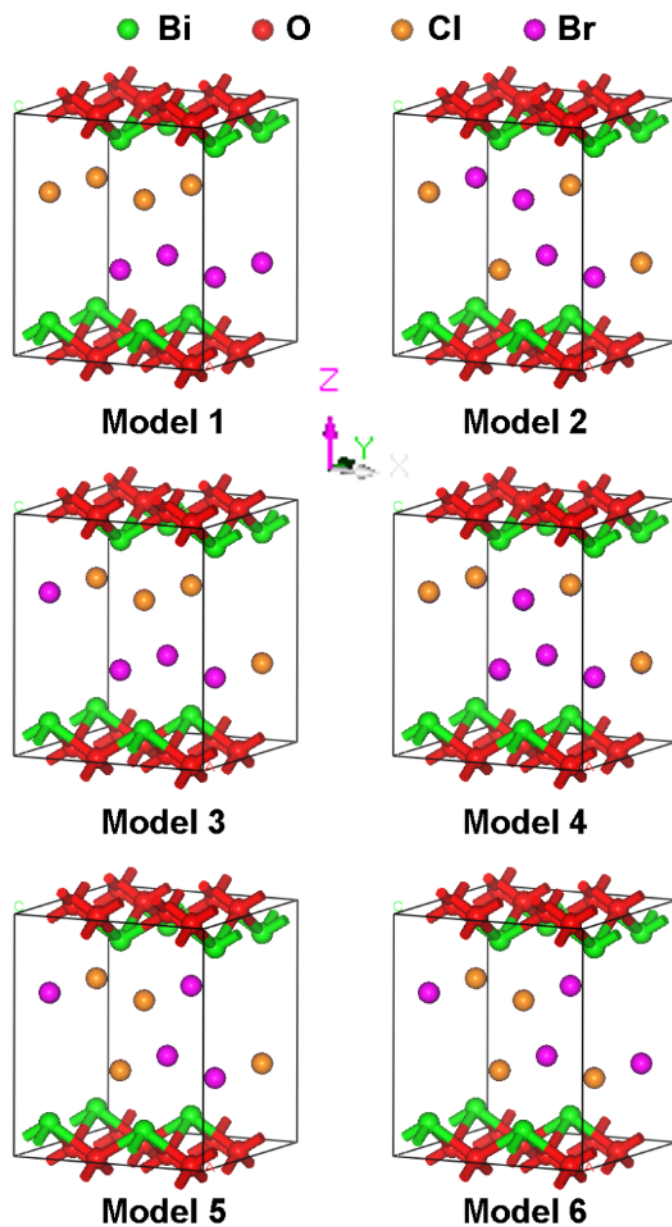

Figure S11. Six possible models of  $\text{BiO}(\text{ClBr})_{0.5}$  for geometry optimization. The band structures of these six models were calculated and similar results were obtained. Since the total energy of Model 1 is the lowest (Table S2), indicating this structure is the most stable, its band structure was chosen as a representative for discussion in Figure 8.

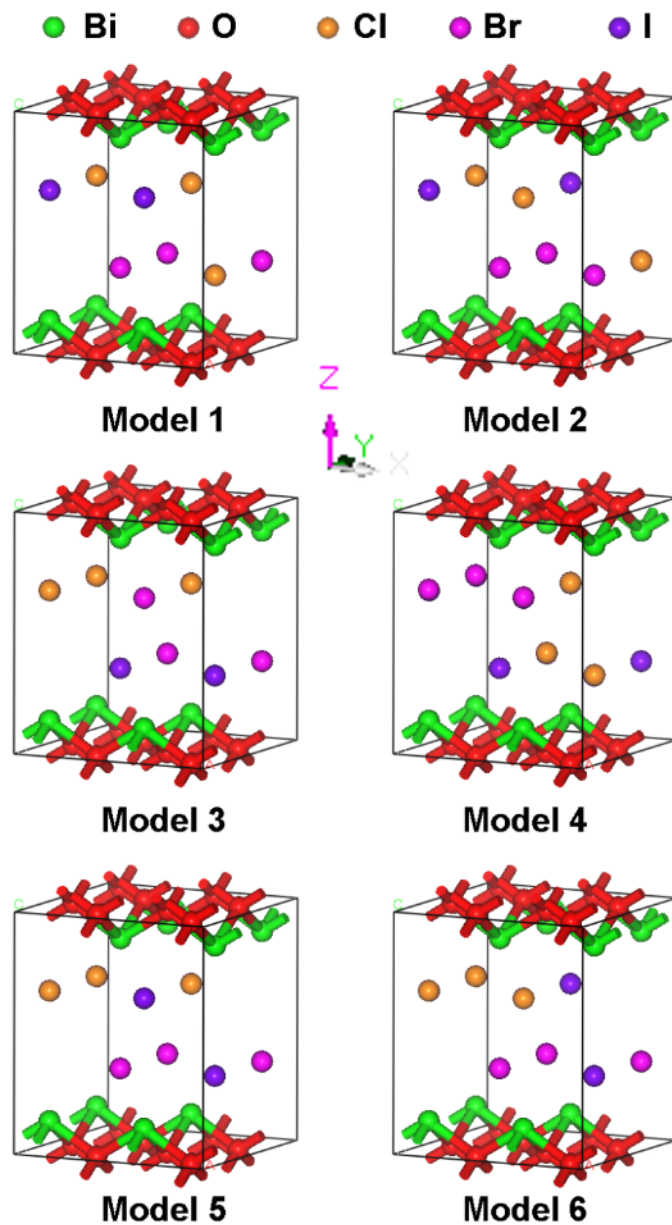

Figure S12. Six possible models of  $\text{BiO}(\text{ClBr})_{0.375}\text{I}_{0.25}$  for geometry optimization. The band structures of these six models were calculated and similar results were obtained. Since the total energy of Model 2 is the lowest (Table S2), indicating this structure is the most stable, its band structure was chosen as a representative for discussion in Figure 8.

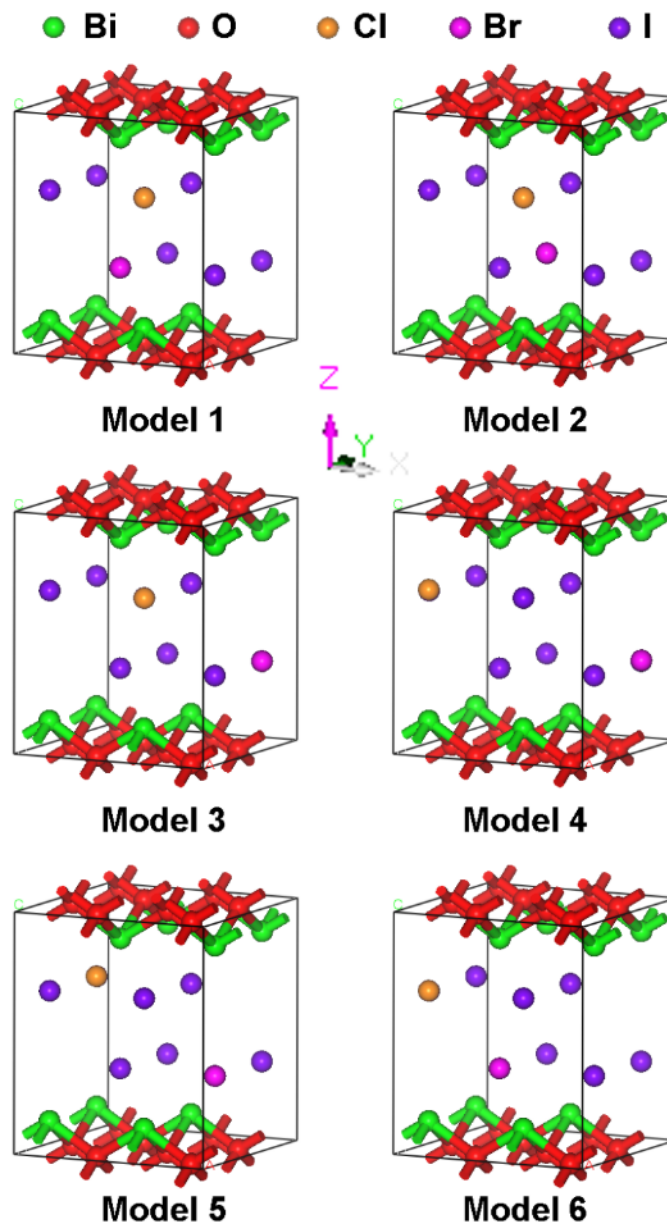

Figure S13. Six possible models of  $\text{BiO}(\text{ClBr})_{0.125}\text{I}_{0.75}$  for geometry optimization. The band structures of these six models were calculated and similar results were obtained. Since the total energy of Model 6 is the lowest (Table S2), indicating this structure is the most stable, its band structure was chosen as a representative for discussion in Figure 8.

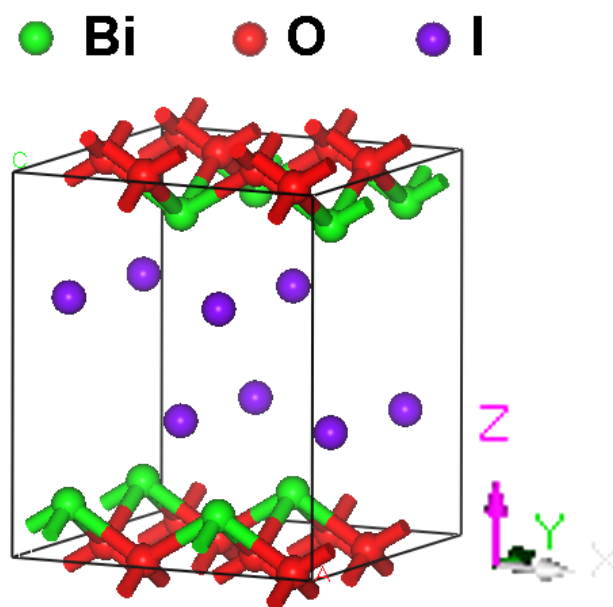

Figure S14. The model of BiOI for geometry optimization.



Table S4. The averages of lattice parameters and band gaps of  $\text{BiO}(\text{ClBr})_{0.5}$ ,  $\text{BiO}(\text{ClBr})_{0.375}\text{I}_{0.25}$ ,  $\text{BiO}(\text{ClBr})_{0.125}\text{I}_{0.75}$  and  $\text{BiOI}$ .<sup>[1]</sup>

| Samples                                          | Average of unit cell lattice parameters (Å) |                 |                 | Average of volume of unit cell (Å <sup>3</sup> ) | Average of band gap (eV) |
|--------------------------------------------------|---------------------------------------------|-----------------|-----------------|--------------------------------------------------|--------------------------|
|                                                  | <i>a</i>                                    | <i>b</i>        | <i>c</i>        |                                                  |                          |
| $\text{BiO}(\text{ClBr})_{0.5}$                  | 3.78278±0.00037                             | 3.78267±0.00037 | 7.61641±0.01986 | 108.983±0.282                                    | 1.95±0.03                |
| $\text{BiO}(\text{ClBr})_{0.375}\text{I}_{0.25}$ | 3.79674±0.00693                             | 3.79188±0.00311 | 8.51109±0.12307 | 122.522±1.556                                    | 1.78±0.17                |
| $\text{BiO}(\text{ClBr})_{0.125}\text{I}_{0.75}$ | 3.84625±0.00138                             | 3.84611±0.00087 | 9.10664±0.00306 | 134.715±0.042                                    | 1.51±0.01                |
| $\text{BiOI}$                                    | 3.87584                                     | 3.87585         | 9.00978         | 135.346                                          | 1.41                     |

[1] The averages were calculated using the data in Table S2.

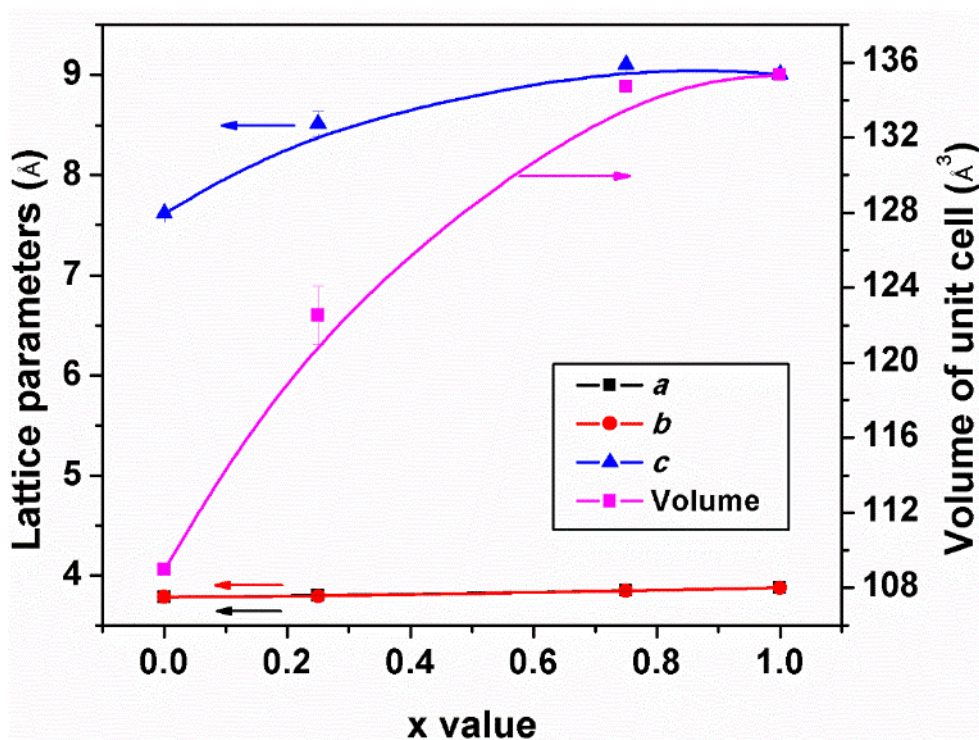

Figure S15. Lattice parameters of  $\text{BiO}(\text{ClBr})_{(1-x)/2}\text{I}_x$  solid solutions obtained from DFT calculation.

As shown in Figure S15, it is found that the  $c$  parameter is more modified than the  $a$  parameter by the halogen substitution, well consistent with the experimental results (Figure 4a)

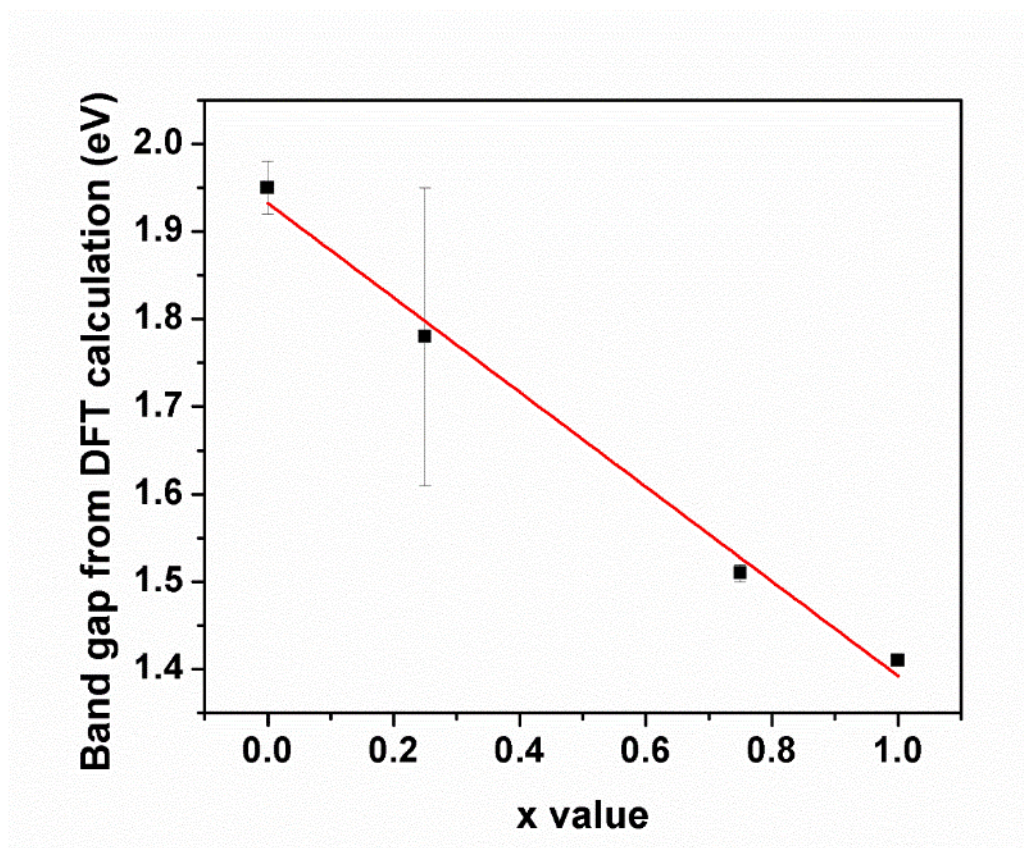

Figure S16. Band gaps of  $\text{BiO}(\text{ClBr})_{(1-x)/2}\text{I}_x$  solid solutions obtained from DFT calculation.

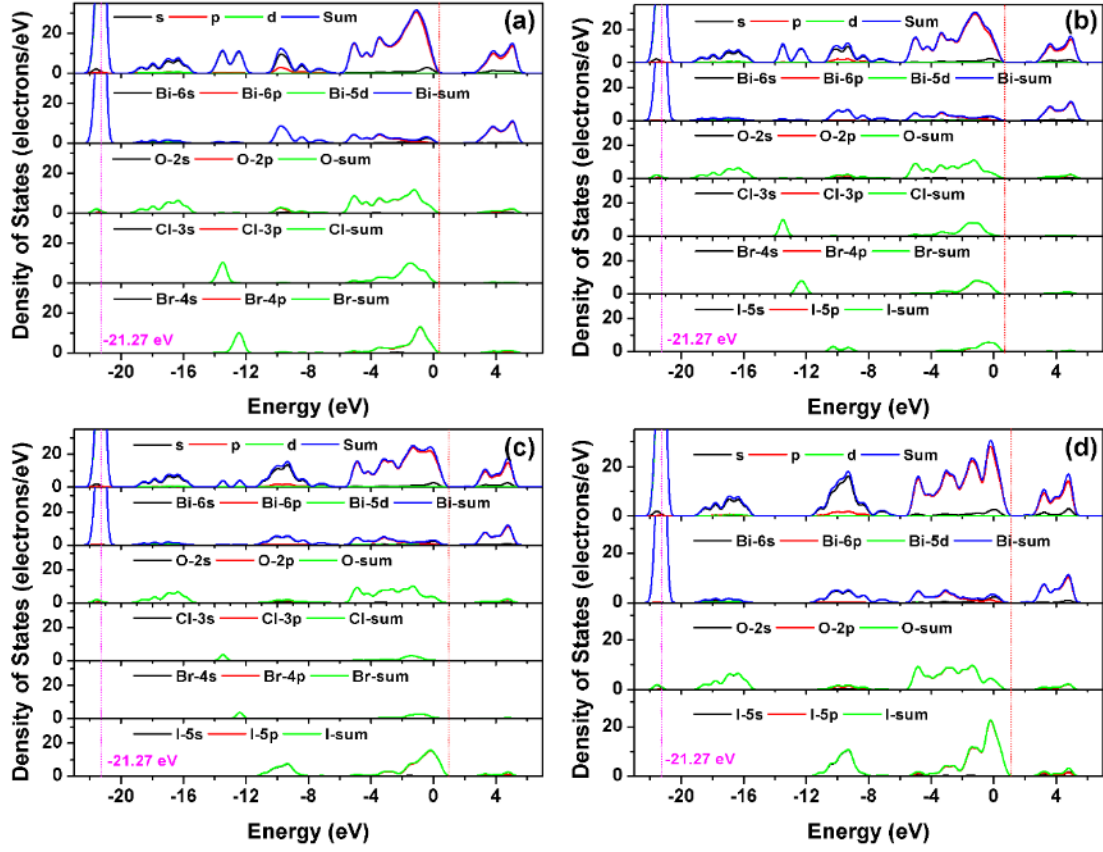

Figure S17. The density of states (DOS) and partial density of states (PDOS) for (a)  $\text{BiO}(\text{ClBr})_{0.5}$ , (b)  $\text{BiO}(\text{ClBr})_{0.375}\text{I}_{0.25}$ , (c)  $\text{BiO}(\text{ClBr})_{0.125}\text{I}_{0.75}$  and (d)  $\text{BiOI}$ , respectively. In order to investigate the evolution of valence band more clearly, the Bi (5d) levels were chosen as the representative core levels as they are the deepest in levels in all the materials.<sup>7, 8</sup>

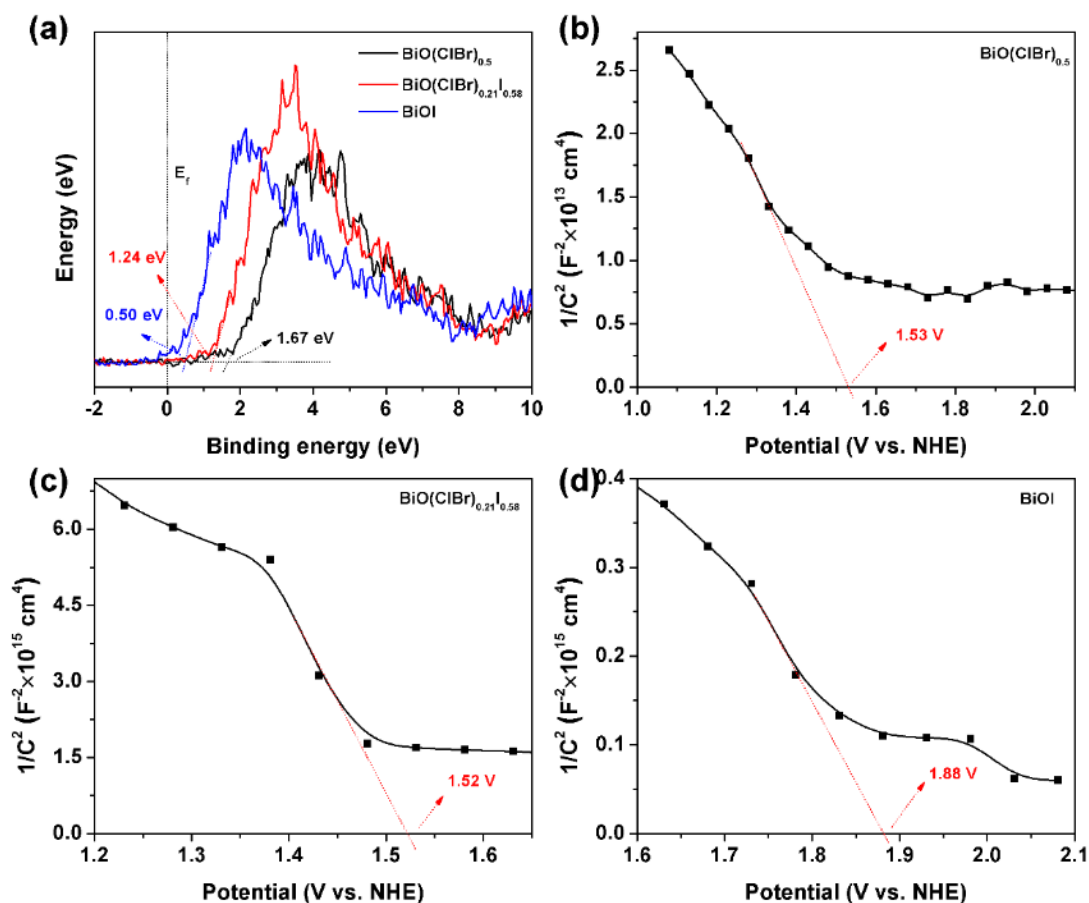

Figure S18. The valence band XPS spectra (a) and Mott–Schottky plots (b–d) of the  $\text{BiO}(\text{ClBr})_{0.5}$ ,  $\text{BiO}(\text{ClBr})_{0.21}\text{I}_{0.58}$ , and  $\text{BiOI}$ . The Mott–Schottky curves were measured at 1000 Hz in 0.5 M  $\text{Na}_2\text{SO}_4$  solution. As calculated from the x intercepts of the linear portion of the Mott–Schottky data, the flat-band potentials are estimated to be 1.53, 1.52 and 1.88 V versus a normal hydrogen electrode (NHE) for  $\text{BiO}(\text{ClBr})_{0.5}$ ,  $\text{BiO}(\text{ClBr})_{0.21}\text{I}_{0.58}$  and  $\text{BiOI}$ , respectively.

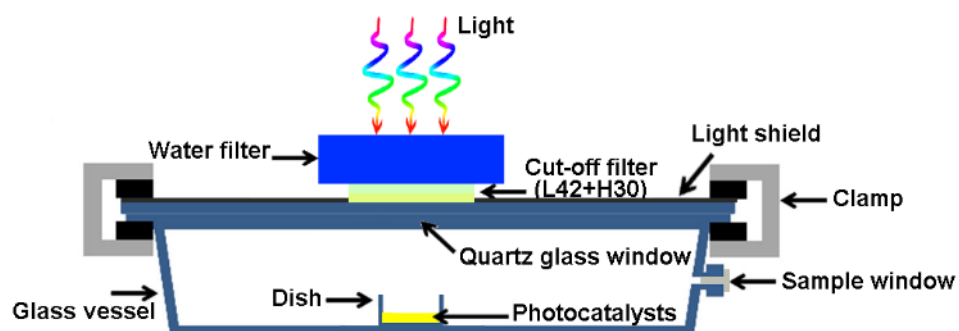

Figure S19. The sketch of the experimental set up for the photodecomposition of IPA in the gas phase.

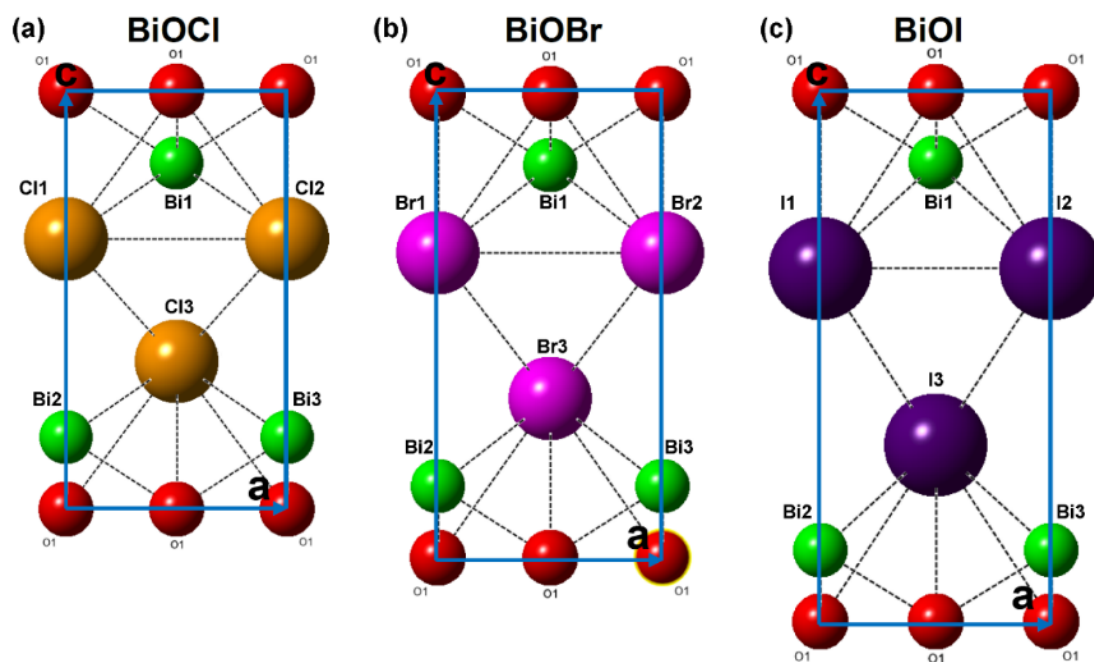

Figure S20. The crystal structure of (a) BiOCl, (b) BiOBr, and (c) BiOI as seen from [010].

Table S5. Ionic radius and bond lengths in BiOCl, BiOBr, and BiOI<sup>4,9</sup>

| Ions             | Ionic radius (Å) | BiOCl                      |       | BiOBr                      |       | BiOI                       |       |
|------------------|------------------|----------------------------|-------|----------------------------|-------|----------------------------|-------|
| Bi <sup>3+</sup> | 1.03             | Bonds and bond lengths (Å) |       | Bonds and bond lengths (Å) |       | Bonds and bond lengths (Å) |       |
| O <sup>2-</sup>  | 1.40             | Bi1-Cl1,Cl2                | 3.059 | Bi1-Br1,Br2                | 3.170 | Bi1-I1,I2                  | 3.362 |
| Cl <sup>-</sup>  | 1.81             | Bi2,Bi3-Cl3                | 3.059 | Bi2,Bi3-Br3                | 3.170 | Bi2,Bi3-I3                 | 3.362 |
| Br <sup>-</sup>  | 1.96             | Cl1-Cl2                    | 3.887 | Br1-Br2                    | 3.923 | Cl1-Cl2                    | 3.995 |
| I <sup>-</sup>   | 2.20             | Cl1,Cl2-Cl3                | 3.487 | Br1,Br2-Br3                | 3.763 | I1,I2-Cl3                  | 4.162 |

Table S6. (001) peak position, full width at half maximum (FWHM) and calculated crystallite size of  $\text{BiO}(\text{ClBr})_{(1-x)/2}\text{I}_x$  solid solutions.

| x value | (001) Peak position ( $^{\circ}2\theta$ ) | FWHM ( $^{\circ}2\theta$ ) | Calculated crystallite size by Scherrer formula (nm) |
|---------|-------------------------------------------|----------------------------|------------------------------------------------------|
| 0       | 11.49                                     | 0.83                       | 9.49                                                 |
| 0.17    | 11.36                                     | 1.21                       | 6.51                                                 |
| 0.25    | 11.32                                     | 1.23                       | 6.40                                                 |
| 0.42    | 11.09                                     | 1.50                       | 5.25                                                 |
| 0.50    | 10.68                                     | 2.22                       | 3.56                                                 |
| 0.58    | 10.91                                     | 1.91                       | 4.13                                                 |
| 0.67    | 10.41                                     | 1.77                       | 4.46                                                 |
| 0.73    | 9.64                                      | 1.73                       | 4.57                                                 |
| 0.78    | 9.62                                      | 1.23                       | 6.40                                                 |
| 0.83    | 9.52                                      | 1.40                       | 5.62                                                 |
| 0.89    | 9.64                                      | 1.40                       | 5.62                                                 |
| 0.94    | 9.65                                      | 0.60                       | 13.05                                                |
| 1.00    | 9.63                                      | 0.27                       | 29.36                                                |

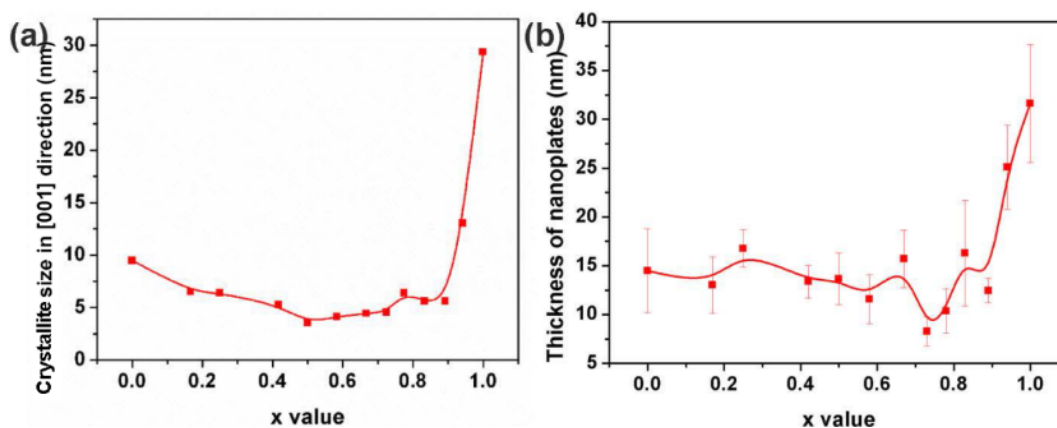

Figure S21. (a) The crystallite size calculated from the (001) peak in XRD pattern and (b) the thickness of nanoplates measured from SEM images.

As shown in Figure S21a and Table S6, the crystallite size in 001 direction was decreased gradually with x increased from 0 to 0.50. However, when x was further increased to 1.00, a significant increase in crystallite size was observed. These results are consistent with SEM images of  $\text{BiO}(\text{ClBr})_{(1-x)/2}\text{I}_x$  solid solutions, which showed that the thickness of the nanoplates was decreased firstly and increased afterward with the

increase of x value (Figure 1, Figure S4 and Figure S21b).

## References

1. A. P. Davis and C. P. Huang, *Water Res.*, 1990, **24**, 543-550.
2. J. Guo, S. Ouyang, H. Zhou, T. Kako and J. Ye, *J. Phys. Chem. C*, 2013, **117**, 17716-17724.
3. H.-Y. Jiang, G. Liu, M. Li, J. Liu, W. Sun, J. Ye and J. Lin, *Appl. Catal., B*, 2015, **163**, 267-276.
4. E. Keller and V. Kramer, *Z. Naturforsch. B*, 2005, **60**, 1255.
5. S. N. Habisreutinger, L. Schmidt-Mende and J. K. Stolarczyk, *Angew. Chem. Int. Ed.*, 2013, **52**, 7372-7408.
6. M. Liu, X. Qiu, M. Miyauchi and K. Hashimoto, *J. Am. Chem. Soc.*, 2013, **135**, 10064-10072.
7. D. J. Temple, A. B. Kehoe, J. P. Allen, G. W. Watson and D. O. Scanlon, *J. Phys. Chem. C*, 2012, **116**, 7334-7340.
8. W. L. Huang and Q. Zhu, *Comput. Mater. Sci.*, 2008, **43**, 1101-1108.
9. R. Shannon, *Acta. Cryst. A*, 1976, **32**, 751-767.
